# Supplementary material
Source: publisher site journal article supplement (https://www.spandidos-publications.com/8264/downloadSupplementary)
Supplement: Supplementary file 1 [file downloadSupplementary]

**Table SI.** Genes correlated with RTKN2 in cholangiocarcinoma.

| <b>RTKN2-correlated genes</b> | <b>Spearman's correlation coefficient</b> | <b>q-Value</b>         |
|-------------------------------|-------------------------------------------|------------------------|
| ARID5B                        | 0.82521                                   | 3.64x10 <sup>-05</sup> |
| CLEC2D                        | 0.787955                                  | 0.000327               |
| UQCRFS1                       | -0.76947                                  | 0.000746               |
| MME                           | 0.757423                                  | 0.001092               |
| GPR19                         | 0.754902                                  | 0.001092               |
| MAMSTR                        | 0.75098                                   | 0.001145               |
| DGKA                          | 0.744538                                  | 0.001385               |
| ARHGEF19                      | 0.742577                                  | 0.001385               |
| LINC00636                     | 0.735006                                  | 0.001866               |
| TSHR                          | 0.729848                                  | 0.002182               |
| MYB                           | 0.728291                                  | 0.002182               |
| NHERF1                        | -0.71821                                  | 0.003356               |
| TIMM10                        | -0.70672                                  | 0.005439               |
| WWC1                          | -0.70364                                  | 0.005848               |
| KLHDC7A                       | -0.70168                                  | 0.005986               |
| ATP5MC3                       | -0.69608                                  | 0.007026               |
| KLRG1                         | 0.695518                                  | 0.007026               |
| FAM110A                       | 0.691597                                  | 0.007801               |
| TNFRSF13C                     | 0.690756                                  | 0.007801               |
| COX7B                         | -0.68739                                  | 0.008609               |
| DNAJB13                       | 0.677638                                  | 0.012531               |
| YES1P1                        | 0.67274                                   | 0.014713               |
| RBP1                          | 0.670588                                  | 0.015037               |
| NDUFS3                        | -0.67003                                  | 0.015037               |
| C17ORF100                     | 0.668067                                  | 0.015037               |
| HOXA1                         | 0.667787                                  | 0.015037               |
| LYPD3                         | 0.666947                                  | 0.015037               |
| SLC37A4                       | -0.66639                                  | 0.015037               |
| FOXO3B                        | 0.664706                                  | 0.015548               |
| TMPO                          | 0.663866                                  | 0.015551               |
| BPIFB1                        | 0.661247                                  | 0.016501               |
| GPAT2                         | 0.660504                                  | 0.016501               |
| ZNF821                        | 0.659664                                  | 0.016501               |
| LRRIQ3                        | 0.658543                                  | 0.016501               |
| MSANTD2                       | 0.658543                                  | 0.016501               |
| NYNRIN                        | 0.655742                                  | 0.017487               |
| FAM216B                       | 0.655668                                  | 0.017487               |
| C10ORF88B                     | 0.654062                                  | 0.018133               |
| IGSF10                        | 0.652567                                  | 0.018728               |
| POC1B-GALNT4                  | 0.647104                                  | 0.021647               |
| DAAM2-AS1                     | 0.646544                                  | 0.021647               |
| HIVEP2-DT                     | 0.646218                                  | 0.021647               |

|           |          |          |
|-----------|----------|----------|
| UBE3D     | 0.645098 | 0.021647 |
| LINC02014 | 0.644982 | 0.021647 |
| NUDT4     | 0.643137 | 0.021647 |
| TEX26-AS1 | 0.643094 | 0.021647 |
| ECSIT     | -0.64258 | 0.021647 |
| NDUFA4    | -0.64258 | 0.021647 |
| LINC02021 | 0.641176 | 0.021647 |
| HOTAIRM1  | 0.640616 | 0.021647 |
| RARG      | 0.640616 | 0.021647 |
| HOXD8     | 0.640336 | 0.021647 |
| PLCB4     | 0.640056 | 0.021647 |
| TMPRSS13  | 0.640056 | 0.021647 |
| TCEA3     | -0.63922 | 0.021647 |
| CEMIP     | 0.639216 | 0.021647 |
| DGAT2-DT  | 0.634186 | 0.025388 |
| CDCA4     | 0.633613 | 0.025388 |
| LINC03047 | 0.633445 | 0.025388 |
| GEMIN2    | 0.632493 | 0.025841 |
| NDUFA1    | -0.63193 | 0.025938 |
| CYSTM1    | -0.63109 | 0.026304 |
| NDUFB5    | -0.62885 | 0.027615 |
| ANKRD65   | 0.628852 | 0.027615 |
| BCL11B    | 0.62577  | 0.030024 |
| ATP5F1A   | -0.62493 | 0.030024 |
| LINC02482 | 0.62493  | 0.030024 |
| COX8A     | -0.62437 | 0.030024 |
| TEX21P    | 0.62437  | 0.030024 |
| RNFT2     | 0.622969 | 0.030842 |
| SALL4     | 0.621849 | 0.030842 |
| TBC1D32   | 0.621569 | 0.030842 |
| UQCRQ     | -0.62129 | 0.030842 |
| CHL1      | 0.621289 | 0.030842 |
| C10ORF67  | 0.621218 | 0.030842 |
| FENDRR    | 0.619048 | 0.032815 |
| HOXA4     | 0.617953 | 0.033232 |
| RRN3P1    | 0.617927 | 0.033232 |
| MSRA      | -0.61737 | 0.033449 |
| BCL2L14   | 0.616807 | 0.033577 |
| CGAS      | 0.616527 | 0.033577 |
| HASPIN    | 0.615686 | 0.034047 |
| CNTNAP1   | 0.615406 | 0.034047 |
| GPR137    | -0.61457 | 0.034619 |
| GAU1      | 0.613875 | 0.03484  |
| LINC00837 | 0.613686 | 0.03484  |
| RUFY3     | 0.612885 | 0.035385 |

|           |          |          |
|-----------|----------|----------|
| ZGRF1     | 0.612325 | 0.035652 |
| TIGD2     | 0.610644 | 0.0371   |
| LINC02732 | 0.610474 | 0.0371   |
| TMX2      | -0.61008 | 0.037175 |
| HOXA2     | 0.608726 | 0.037899 |
| HOXA9     | 0.608416 | 0.037899 |
| TXK       | 0.608123 | 0.037899 |
| SAP30-DT  | 0.607843 | 0.037899 |
| DNAJB6P3  | 0.607801 | 0.037899 |
| LINC00954 | 0.607563 | 0.037899 |
| ZNF589    | 0.607283 | 0.037899 |
| NABP1     | 0.605882 | 0.039297 |
| CRLF3     | 0.604482 | 0.040661 |
| TVP23C    | 0.604202 | 0.040661 |
| VIRMA-DT  | 0.603922 | 0.040661 |
| LINC03060 | 0.603641 | 0.040661 |
| FMO2      | 0.603081 | 0.041016 |
| NINJ1     | -0.60196 | 0.042139 |
| MYOSLID   | 0.601009 | 0.042378 |
| COL4A6    | 0.60084  | 0.042378 |
| WNT16     | 0.599902 | 0.042378 |
| CHODL     | 0.59986  | 0.042378 |
| HIF3A     | 0.59972  | 0.042378 |
| SKI       | 0.59944  | 0.042378 |
| GPC2      | 0.59916  | 0.042378 |
| RCC2      | 0.59888  | 0.042378 |
| LINC01505 | 0.598327 | 0.042378 |
| TMEM151A  | -0.59804 | 0.042378 |
| ESRRA     | -0.59804 | 0.042378 |
| ZNF24TR   | 0.597759 | 0.042378 |
| GOT1      | -0.59776 | 0.042378 |
| LINC00989 | 0.597561 | 0.042378 |
| HOXB4     | 0.597199 | 0.042378 |
| RN7SL672P | 0.597115 | 0.042378 |
| ZNF286B   | 0.596919 | 0.042378 |
| CDCA7     | 0.596639 | 0.042378 |
| SEMA4A    | 0.596639 | 0.042378 |
| SIGLEC6   | 0.596349 | 0.042382 |
| STARD9    | 0.596078 | 0.042382 |
| CCDC190   | 0.595784 | 0.042382 |
| WRAP73    | 0.595518 | 0.042382 |
| COX5B     | -0.59524 | 0.042382 |
| SFR1      | 0.594678 | 0.042382 |
| KLHL17    | 0.594398 | 0.042382 |
| SMIM45    | 0.594004 | 0.042382 |

|             |          |          |
|-------------|----------|----------|
| CACNB1      | 0.593838 | 0.042382 |
| CRAT        | -0.59384 | 0.042382 |
| ARMC2       | 0.593557 | 0.042382 |
| NT5DC2      | 0.593277 | 0.042382 |
| TEX14       | 0.593277 | 0.042382 |
| CPNE8-AS1   | -0.59328 | 0.042382 |
| ATP2A3      | 0.592437 | 0.04321  |
| PTCH2       | 0.591597 | 0.043512 |
| EEF1A1P23   | 0.591455 | 0.043512 |
| NUDCD1      | 0.591317 | 0.043512 |
| GPI         | -0.59132 | 0.043512 |
| ADAT2       | 0.591036 | 0.043592 |
| CMA1        | 0.590602 | 0.043887 |
| C21ORF91    | 0.589916 | 0.044534 |
| HSPE1P27    | 0.589356 | 0.044709 |
| TMC3-AS1    | 0.589356 | 0.044709 |
| FAM24B      | 0.588796 | 0.045082 |
| GRIFIN      | 0.58852  | 0.045082 |
| SUCLG1      | -0.58824 | 0.045082 |
| ATG16L2     | 0.588235 | 0.045082 |
| EIF3K       | -0.58768 | 0.045575 |
| OR10A2      | 0.587032 | 0.046192 |
| ATP23       | 0.586555 | 0.046281 |
| LINC00910   | 0.586555 | 0.046281 |
| SLC22A18    | -0.58571 | 0.046828 |
| ZNF707      | 0.585434 | 0.046828 |
| PELP1-DT    | 0.585414 | 0.046828 |
| GRIK2       | 0.585213 | 0.046828 |
| SLC16A1-AS1 | 0.585154 | 0.046828 |
| LINC02917   | 0.58435  | 0.047466 |
| ADAMTS6     | 0.584314 | 0.047466 |
| ALG1L2      | 0.584034 | 0.047585 |
| BTN2A3P     | 0.583754 | 0.047705 |
| SYTL2       | 0.583193 | 0.048001 |
| CFAP73      | 0.582674 | 0.048001 |
| CSRP2       | 0.582633 | 0.048001 |
| GPR142      | 0.581942 | 0.048001 |
| TMEM120A    | -0.58179 | 0.048001 |
| FTLP12      | 0.581579 | 0.048001 |
| HAPLN3      | 0.581513 | 0.048001 |
| AGR2        | 0.581513 | 0.048001 |
| FBXW10      | 0.581487 | 0.048001 |
| RHEBL1      | 0.580952 | 0.048001 |
| RNU6-482P   | 0.580875 | 0.048001 |
| ANKRD65-AS1 | 0.580659 | 0.048001 |

|            |          |          |
|------------|----------|----------|
| MTCO1P40   | -0.58011 | 0.048001 |
| CHCHD10    | -0.57983 | 0.048001 |
| MIR222HG   | 0.579832 | 0.048001 |
| CHMP2A     | -0.57983 | 0.048001 |
| JPH3       | 0.579452 | 0.048001 |
| C12ORF56   | 0.579388 | 0.048001 |
| HGD        | -0.57927 | 0.048001 |
| CXCL5      | 0.579272 | 0.048001 |
| COX6B1     | -0.57871 | 0.048001 |
| POLR2KP1   | 0.578449 | 0.048001 |
| COQ9       | -0.57787 | 0.048001 |
| CASP2      | 0.577871 | 0.048001 |
| SLC38A5    | 0.577591 | 0.048001 |
| HMGB2      | 0.577311 | 0.048001 |
| LINC00365  | -0.57731 | 0.048001 |
| APCS       | -0.57731 | 0.048001 |
| LINC02669  | 0.577031 | 0.048001 |
| ASB3       | 0.577031 | 0.048001 |
| MLXIP      | 0.577031 | 0.048001 |
| PABPC1P4   | 0.577031 | 0.048001 |
| RPIA       | 0.577031 | 0.048001 |
| STK32A-AS1 | 0.577014 | 0.048001 |
| KIZ-AS1    | 0.576831 | 0.048001 |
| DNER       | -0.57675 | 0.048001 |
| TARID      | 0.576594 | 0.048001 |
| ZNF785     | 0.57619  | 0.048001 |
| FANCE      | 0.57619  | 0.048001 |
| CDC7       | 0.57619  | 0.048001 |
| FOXB1      | 0.575951 | 0.048001 |
| CCDC88C    | 0.57591  | 0.048001 |
| DFFB       | 0.57591  | 0.048001 |
| TAS2R20    | 0.57563  | 0.048173 |
| SCPEP1     | 0.57451  | 0.049574 |

---

**Table SII.** Outputs of the CAVITY module (CavityPlus 2022 web server)using the MD-minimized RTKN2 structure.

| Site | PredictedmaximumpKa | PredictedaveragepKa | Drug score | Druggability |
|------|---------------------|---------------------|------------|--------------|
| 1    | 8.87                | 6.83                | -2         | Medium       |
| 2    | 9.59                | 6.88                | 4037       | Strong       |
| 3    | 11.37               | 7                   | -228       | Weak         |
| 4    | 11.41               | 6.99                | 563        | Medium       |
| 5    | 11.61               | 6.89                | 3544       | Strong       |
| 6    | 11.69               | 6.85                | 119        | Medium       |
| 7    | 11.84               | 6.68                | 57         | Medium       |
| 8    | 11.08               | 6.42                | -357       | Weak         |
| 9    | 10.9                | 6.36                | 1062       | Strong       |
| 10   | 10.75               | 6.3                 | -620       | Weak         |
| 11   | 10.74               | 6.3                 | 245        | Medium       |
| 12   | 10.04               | 6.06                | -83        | Medium       |
| 13   | 9.37                | 5.83                | -122       | Medium       |
| 14   | 9.28                | 5.8                 | 277        | Medium       |
| 15   | 9.25                | 5.79                | -322       | Weak         |
| 16   | 9.21                | 5.78                | -7         | Medium       |
| 17   | 8.33                | 5.47                | -829       | Weak         |
| 18   | 8.32                | 5.47                | -382       | Weak         |
| 19   | 8.26                | 5.45                | -1233      | Weak         |
| 20   | 7.98                | 5.36                | -825       | Weak         |
| 21   | 7.57                | 5.21                | -818       | Weak         |
| 22   | 7.21                | 5.09                | -923       | Weak         |
| 23   | 7.19                | 5.08                | -599       | Weak         |
| 24   | 7.09                | 5.05                | -1280      | Weak         |
| 25   | 6.98                | 5.01                | -830       | Weak         |
| 26   | 6.64                | 4.89                | -1188      | Weak         |
| 27   | 6.13                | 4.72                | -1117      | Weak         |
| 28   | 5.9                 | 4.64                | -1173      | Weak         |
| 29   | 5.82                | 4.62                | -1532      | Weak         |
| 30   | 5.61                | 4.54                | -1250      | Weak         |
| 31   | 5.44                | 4.49                | -1482      | Weak         |

The selection for docking-based virtual screening was mainly based on the level of druggability.MD, molecular dynamics; RTKN2, Rhotekin 2.
